# Supplementary material for: Piperazine-based simple structure for selective sensing of Hg2+ and glutathione and construction of a logic circuit mimicking an INHIBIT gate
Source: Royal Society of Chemistry journal article supplement (doi:10.1039/c3nj00855j), 2013-01-01

## Piperazine-based simple structure for selective sensing of Hg<sup>2+</sup> and glutathione and construction of logic circuit mimicking INHIBIT gate

Kumares Ghosh<sup>\*a</sup>, Debojyoti Tarafdar<sup>a</sup>, Asmita Samadder<sup>b</sup> and Anisur Rahman Khuda-Bukhsh<sup>b</sup>

<sup>a</sup>Department of Chemistry, University of Kalyani, Kalyani-741235, India. Email: ghosh\_k2003@yahoo.co.in, Fax: +913325828282; Tel: +913325828750; <sup>b</sup>Department of Zoology, University of Kalyani, Kalyani-741235, India.

### 1. Change in emission of receptor 1 with various metal ions in THF

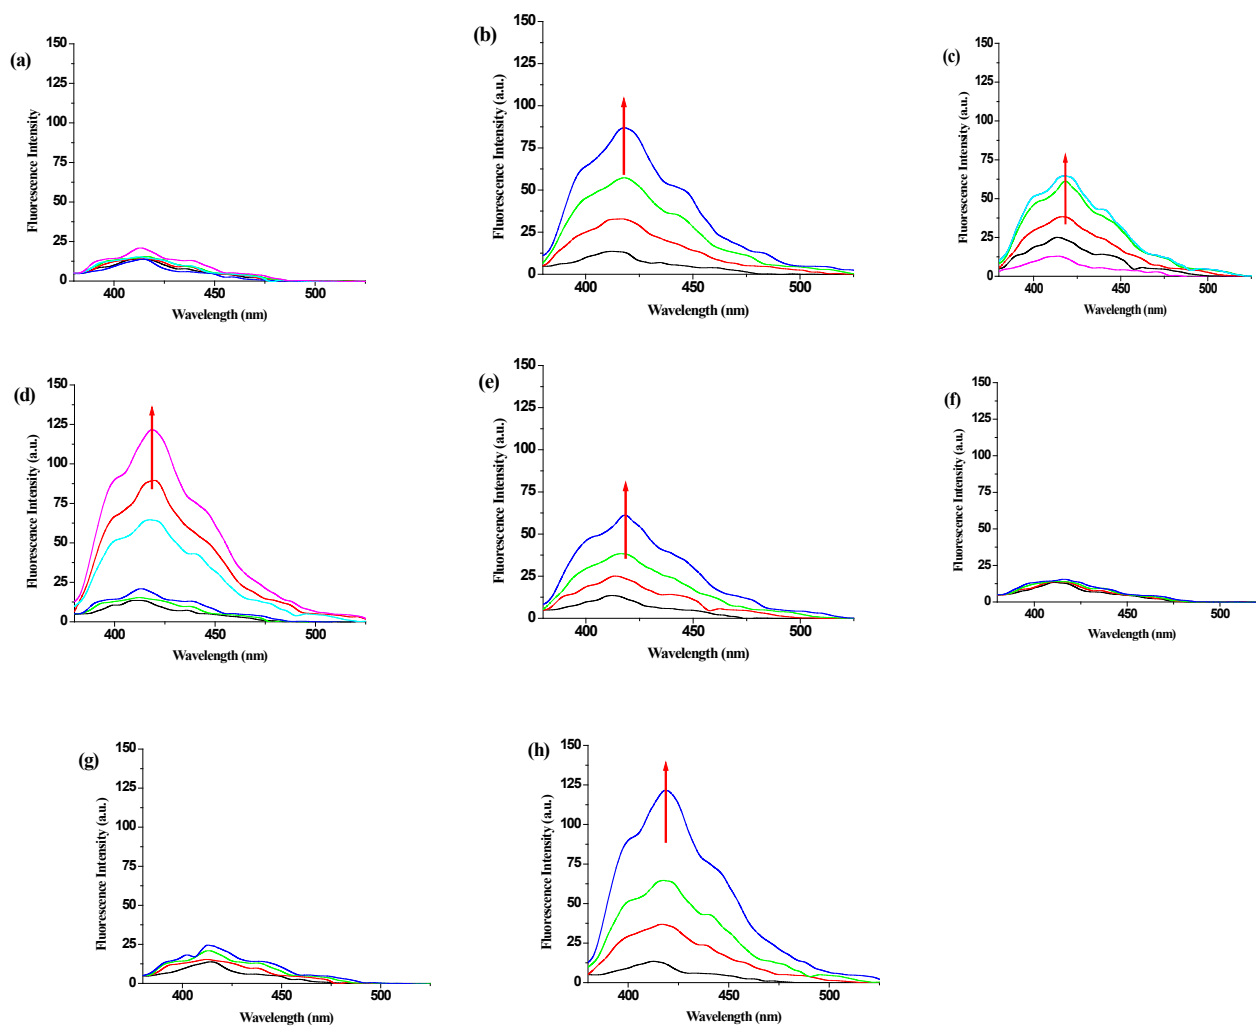

**Figure 1S.** Change in emission of **1** ( $c = 2.5 \times 10^{-5}$  M) in THF upon addition of (a) AgClO<sub>4</sub>, (b) Zn(ClO<sub>4</sub>)<sub>2</sub>, (c) Cd(ClO<sub>4</sub>)<sub>2</sub>, (d) Co(ClO<sub>4</sub>)<sub>2</sub>, (e) Cu(ClO<sub>4</sub>)<sub>2</sub>, (f) Mg(ClO<sub>4</sub>)<sub>2</sub>, (g) Ni(ClO<sub>4</sub>)<sub>2</sub>, (h) Pb(ClO<sub>4</sub>)<sub>2</sub>, [concentration of metal salts were  $1 \times 10^{-3}$  M].

## 2. Change in emission of receptor 1 with various metal ions in (THF-H<sub>2</sub>O, 3:1 v/v) .

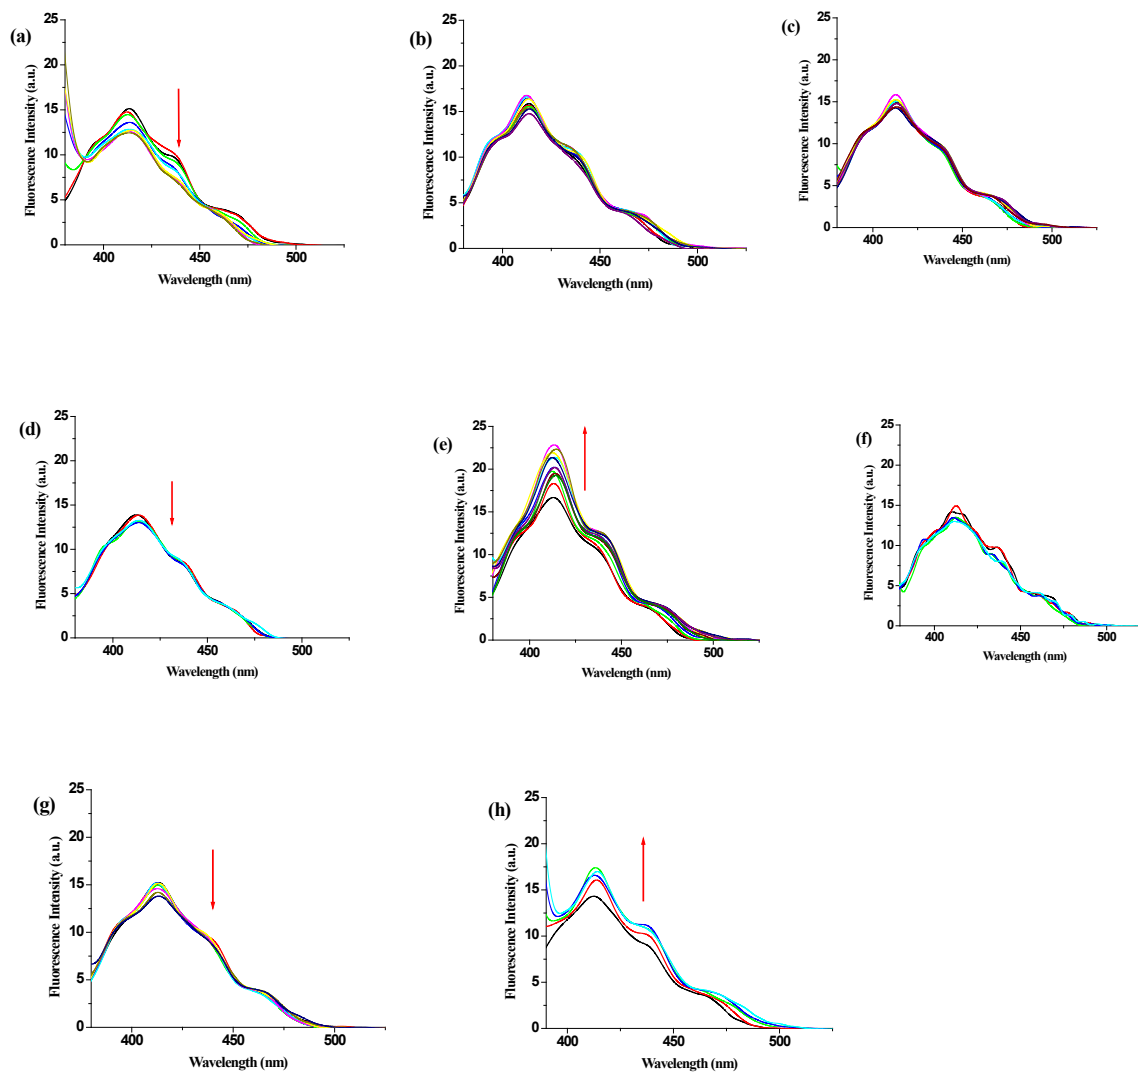

**Figure 2S.** Change in emission of 1 ( $c = 2.5 \times 10^{-5}$  M) in THF-Water (3:1 v/v) upon addition of (a) AgClO<sub>4</sub> (b) Zn(ClO<sub>4</sub>)<sub>2</sub>, (c) Cd(ClO<sub>4</sub>)<sub>2</sub>, (d) Co(ClO<sub>4</sub>)<sub>2</sub> (e) Cu(ClO<sub>4</sub>)<sub>2</sub>, (f) Mg(ClO<sub>4</sub>)<sub>2</sub>, (g) Ni(ClO<sub>4</sub>)<sub>2</sub>, (h) Pb(ClO<sub>4</sub>)<sub>2</sub>, [concentration of metal salts were  $1 \times 10^{-3}$  M].

### 3. Change in absorbance of receptor 1 with various metal ions in THF.

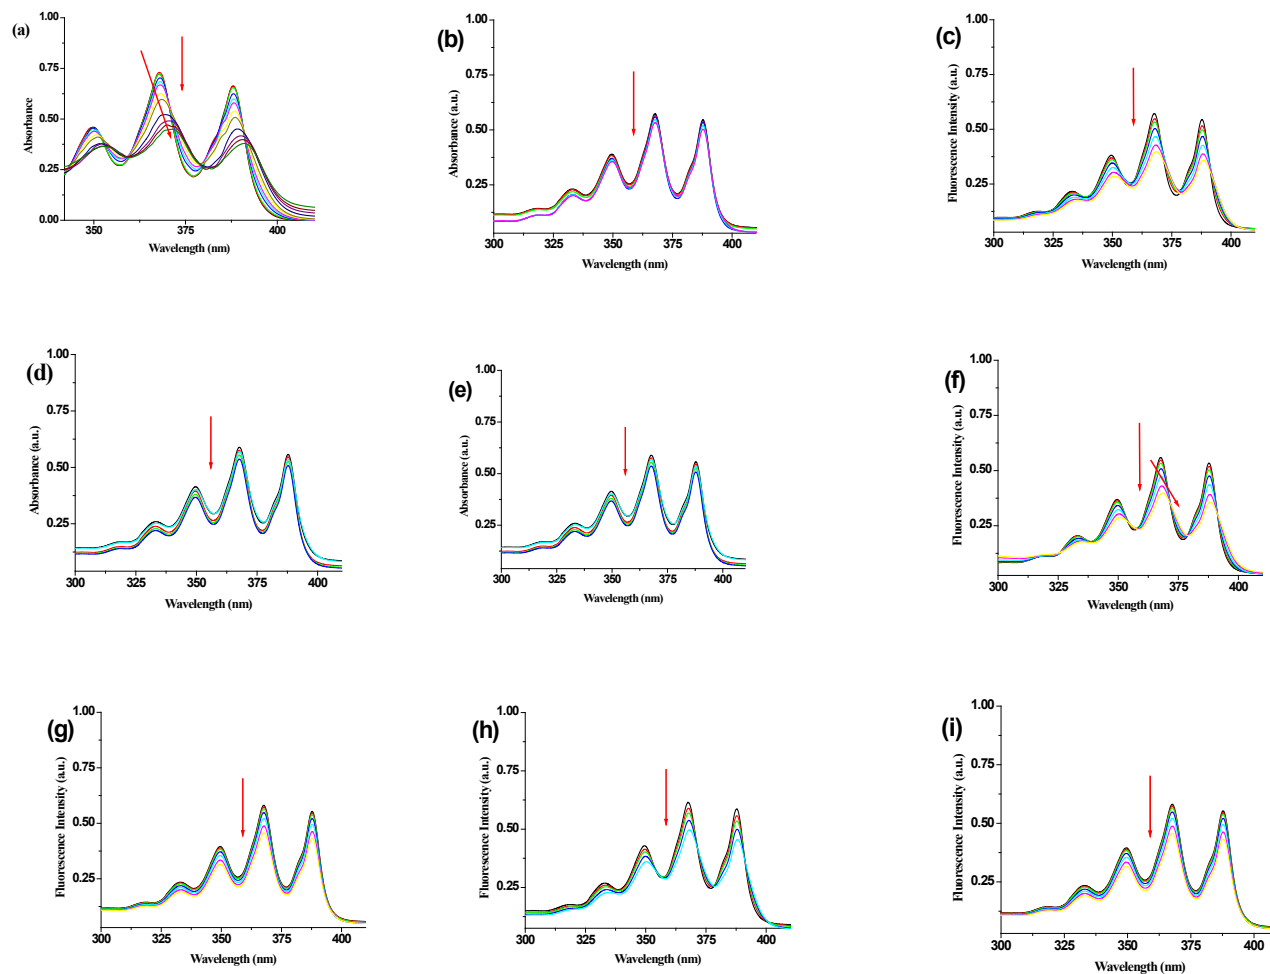

**Figure 3S.** Change in absorbance of **1** ( $c = 2.5 \times 10^{-5}$  M) in THF upon addition of (a) Hg(ClO<sub>4</sub>)<sub>2</sub>, (b) AgClO<sub>4</sub>, (c) Zn(ClO<sub>4</sub>)<sub>2</sub>, (d) Cd(ClO<sub>4</sub>)<sub>2</sub>, (e) Cu(ClO<sub>4</sub>)<sub>2</sub>, (f) Co(ClO<sub>4</sub>)<sub>2</sub>, (g) Mg(ClO<sub>4</sub>)<sub>2</sub>, (h) Pb(ClO<sub>4</sub>)<sub>2</sub>, (i) Ni(ClO<sub>4</sub>)<sub>2</sub> [concentration of metal salts were  $1 \times 10^{-3}$  M].

#### 4. UV-Vis Job plot of receptor 1 with $\text{Hg}(\text{ClO}_4)_2$ in (THF- $\text{H}_2\text{O}$ , 3:1 v/v).

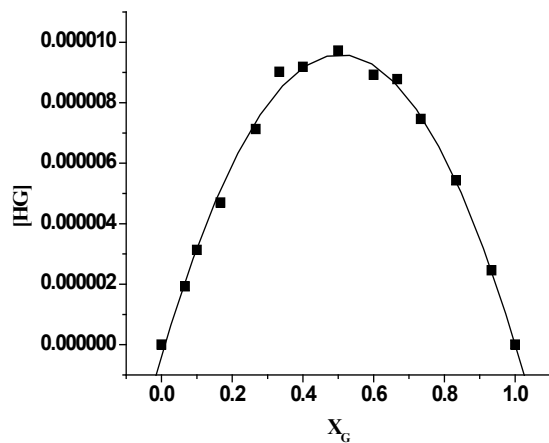

Figure 4S. UV-vis Job plot for receptor 1 with  $\text{Hg}^{2+}$  ( $[\text{H}] = [\text{G}] = 2.5 \times 10^{-5} \text{ M}$ ).

#### 5. Binding constant curve for 1 with $\text{Hg}^{2+}$ .

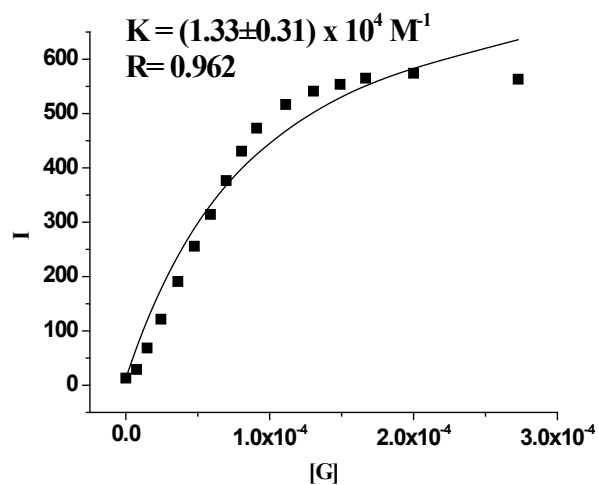

Figure 5S. Non linear binding constant curve for receptor 1 ( $c = 2.5 \times 10^{-5} \text{ M}$ ) with  $\text{Hg}^{2+}$  ( $c = 1 \times 10^{-3} \text{ M}$ ).



## 6. Comparison of IR- Sepctra.

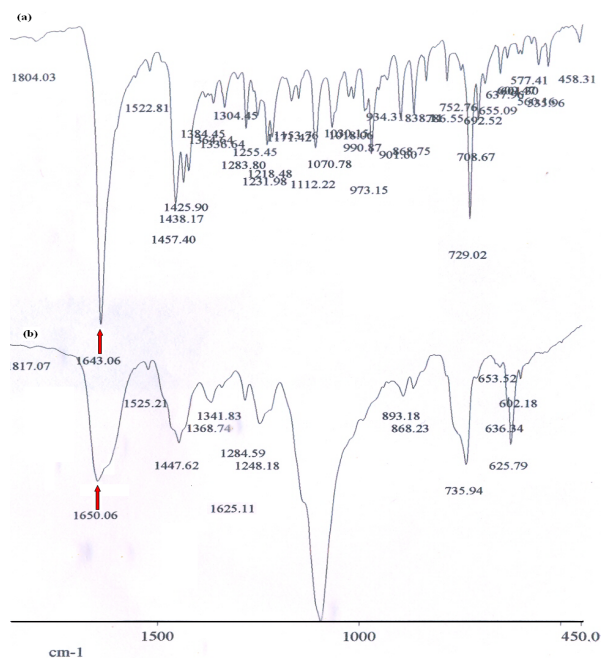

Figure 6S. Partial IR spectrum of (a) **1** and (b) **1** in presence of equivalent amounts of Hg(ClO<sub>4</sub>)<sub>2</sub>.

## 7. Change in emission of **1** upon addition of Hg<sup>2+</sup> in THF-HEPES buffer (10 mmol, pH 7.4) 3:1, v/v.

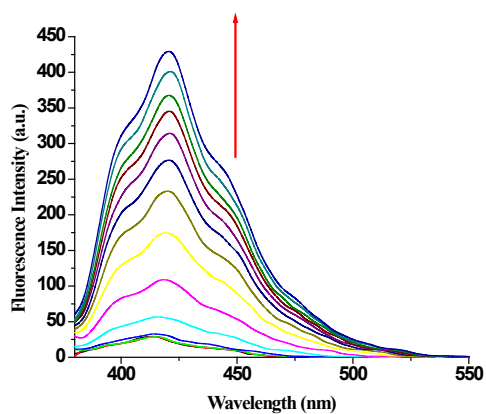

Figure 7S. Change in emission of receptor **1** (c = 2.5 × 10<sup>-5</sup> M) in THF-HEPES buffer (10 mmol, pH 7.4) 3:1, v/v. upon addition of 10 equiv. amounts of Hg(ClO<sub>4</sub>)<sub>2</sub>.

## 8. Detection sensitivity level of 1 for $\text{Hg}(\text{ClO}_4)_2$ .

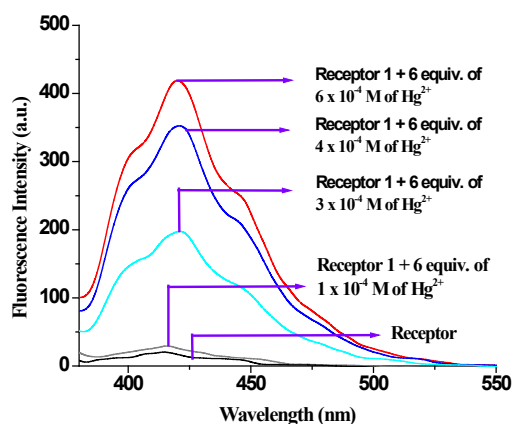

Figure 8S. Change in emission of receptor 1 upon addition of 6 equiv. of different concentrations of  $\text{Hg}^{2+}$ .

## 9. Change in emission of 2 upon addition of $\text{Hg}^{2+}$ in (THF- $\text{H}_2\text{O}$ , 3:1 v/v) and fluorescence Job plot of receptor 2 with $\text{Hg}(\text{ClO}_4)_2$ in (THF- $\text{H}_2\text{O}$ , 3:1 v/v).

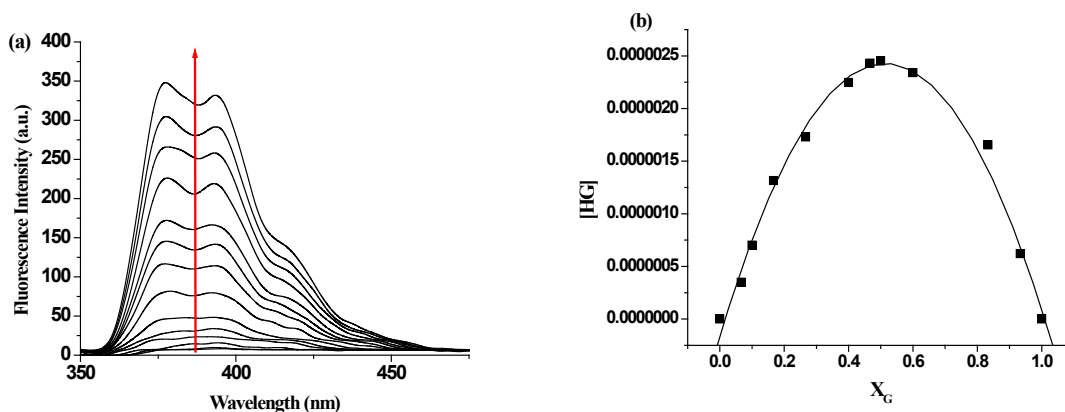

Figure 9S. (a) Change in emission of 2 ( $c = 2.5 \times 10^{-5}$  M) in THF-Water (3:1 v/v) upon addition of 10 equiv. of  $\text{Hg}(\text{ClO}_4)_2$  ( $c = 1 \times 10^{-3}$  M); (b) fluorescence Job plot for 2 with  $\text{Hg}^{2+}$  ( $[\text{H}] = [\text{G}] = 2.5 \times 10^{-5}$  M).

### 10. Binding constant curve for 2 with $\text{Hg}^{2+}$ .

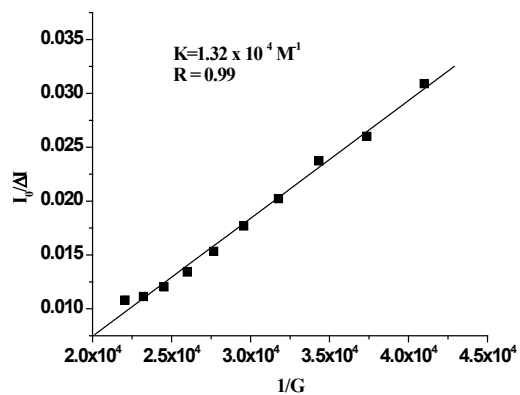

**Figure 10S.** linear fittings for binding constant curve of 2 ( $c = 2.5 \times 10^{-5}$  M) with  $\text{Hg}^{2+}$  ( $c = 1 \times 10^{-3}$  M).

### 11. Selectivity experiment on 2 towards sensing of $\text{Hg}^{2+}$ over other metal ions.

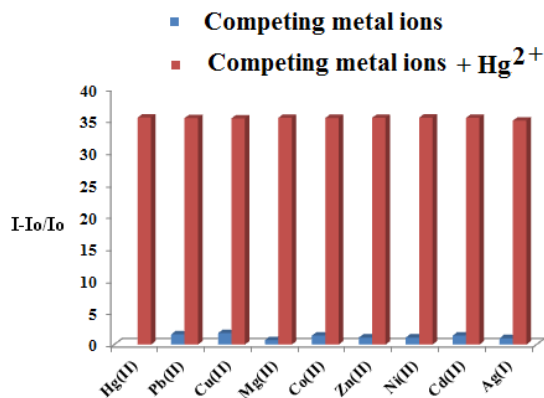

**Figure 11S.** Selectivity of 2 ( $c = 2.5 \times 10^{-5}$  M) towards  $\text{Hg}^{2+}$  ( $c = 1 \times 10^{-3}$  M) in presence of different cations in THF- $\text{H}_2\text{O}$  (3:1, v/v). 7 equiv.

## 12. Detection sensitivity level of **2** for $\text{Hg}(\text{ClO}_4)_2$

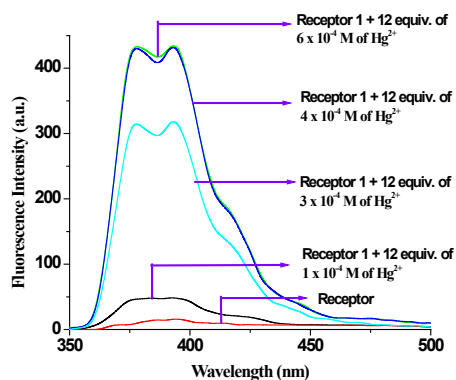

Figure 12S. Change in emission of **2** upon addition of 6 equiv. of different concentrations of  $\text{Hg}^{2+}$ .

## 13. Change in emission of “**1**- $\text{Hg}^{2+}$ ” ensemble upon addition of Cys and Hcy in THF: $\text{H}_2\text{O}$ (pH 7.4, HEPES buffer 10 mmol, 3:1, v/v)

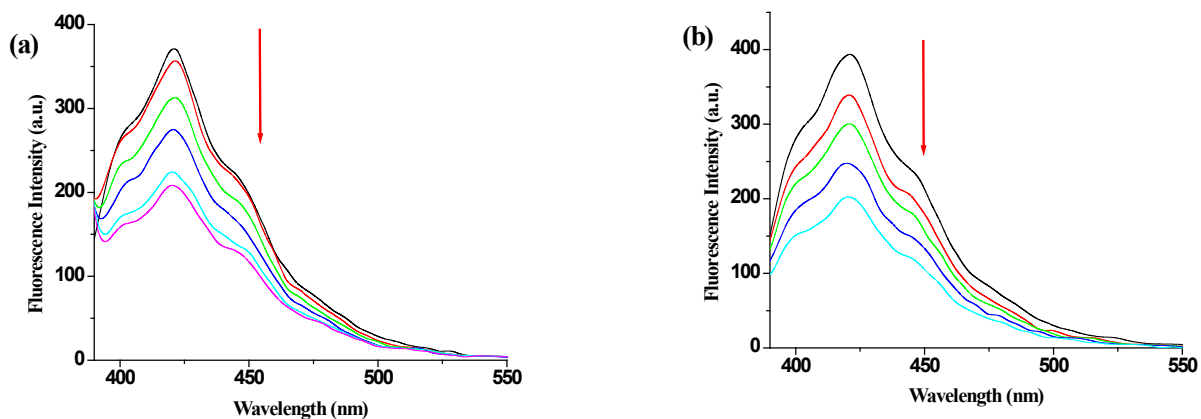

Figure 13S. Fluorescence emission spectra of **1**- $\text{Hg}^{2+}$  complex in THF- $\text{H}_2\text{O}$  (10 mmol HEPES, pH 7.4, 3:1, v/v) upon addition of 30 equiv. amounts of (a) Cysteine and (b) Homocysteine.

#### 14. Fluorescence emission spectra of 1.Hg<sup>2+</sup>.GSH upon various additions of Hg<sup>2+</sup>

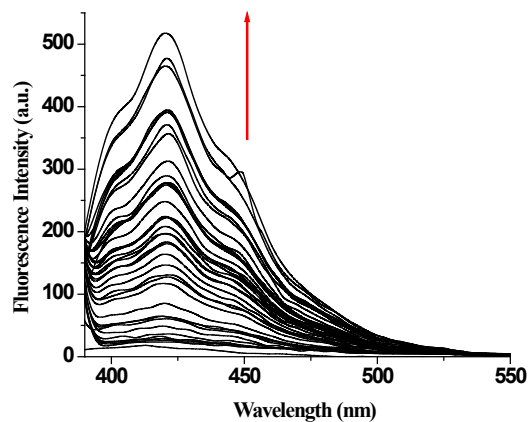

Figure 14S. Change in emission from solution of 1.Hg<sup>2+</sup>.GSH upon gradual addition of Hg<sup>2+</sup>.

#### 15. Change in fluorescence ratio of “2.Hg<sup>2+</sup>” ensemble upon addition of Cys, Hcy and GSH

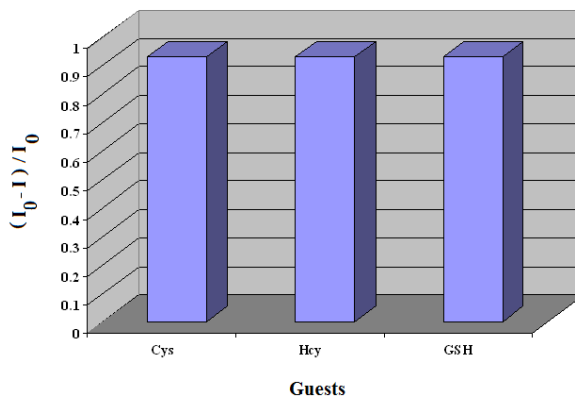

Figure 15S. Change in fluorescence ratio at 385 nm for ‘2-Hg<sup>2+</sup>’ ensemble upon addition of 30 equiv. of various thiols ( $c = 1 \times 10^{-3}$  M) in THF-H<sub>2</sub>O (3:1, v/v; 10 mmol HEPES buffer, pH 7.4;  $\lambda_{ex} = 340$  nm).

## 16. MTT assays for 1 and 2

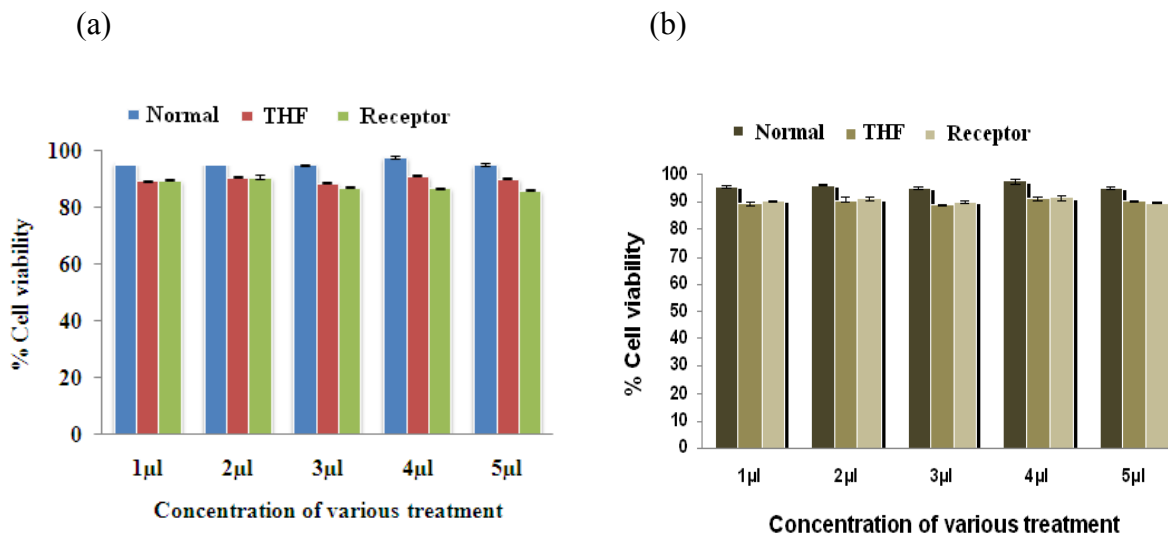

Figure 16S. MTT assays for (a) 1 and (b) 2.

## 17. Fluorescence and bright field images of HeLa cells upon incubation with 2 and $\text{Hg}(\text{ClO}_4)_2$

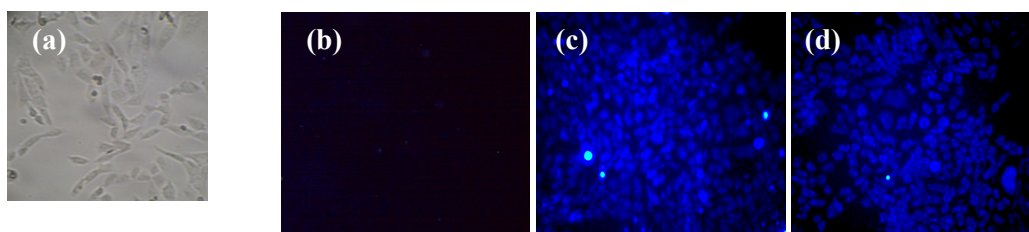

Figure 17S. (a) Bright field image of cells treated with receptor 2 (10  $\mu\text{M}$ ) for 1 h at 37  $^\circ\text{C}$ , (b) Fluorescence image of cells treated with 2 (10  $\mu\text{M}$ ) for 1 h at 37  $^\circ\text{C}$ , (c) Blue fluorescence image of cells upon treatment with receptor 2 (10  $\mu\text{M}$ ) and then  $\text{Hg}(\text{ClO}_4)_2$  (30  $\mu\text{M}$ ) for 30 min at 37  $^\circ\text{C}$ , (d) Blue fluorescence image of cells upon treatment with 2 (10  $\mu\text{M}$ ) and then  $\text{Hg}(\text{ClO}_4)_2$  (30.0  $\mu\text{M}$ ) for 1 h at 37  $^\circ\text{C}$ .

**<sup>1</sup>H NMR of 1 (400 MHz, CDCl<sub>3</sub>):**

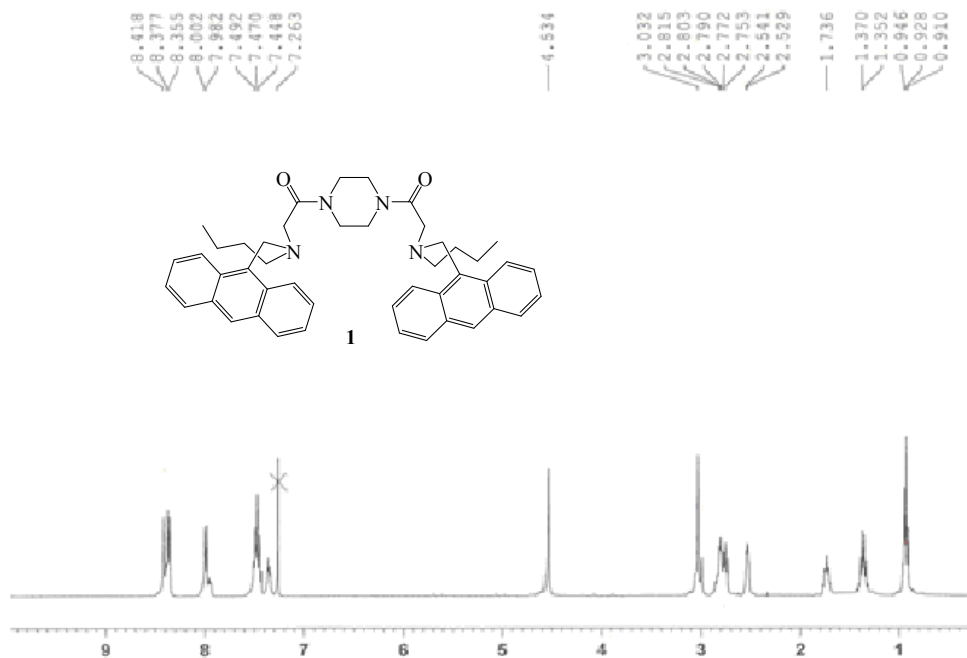

**<sup>13</sup>C NMR of 1 (CDCl<sub>3</sub>, 100 MHz):**

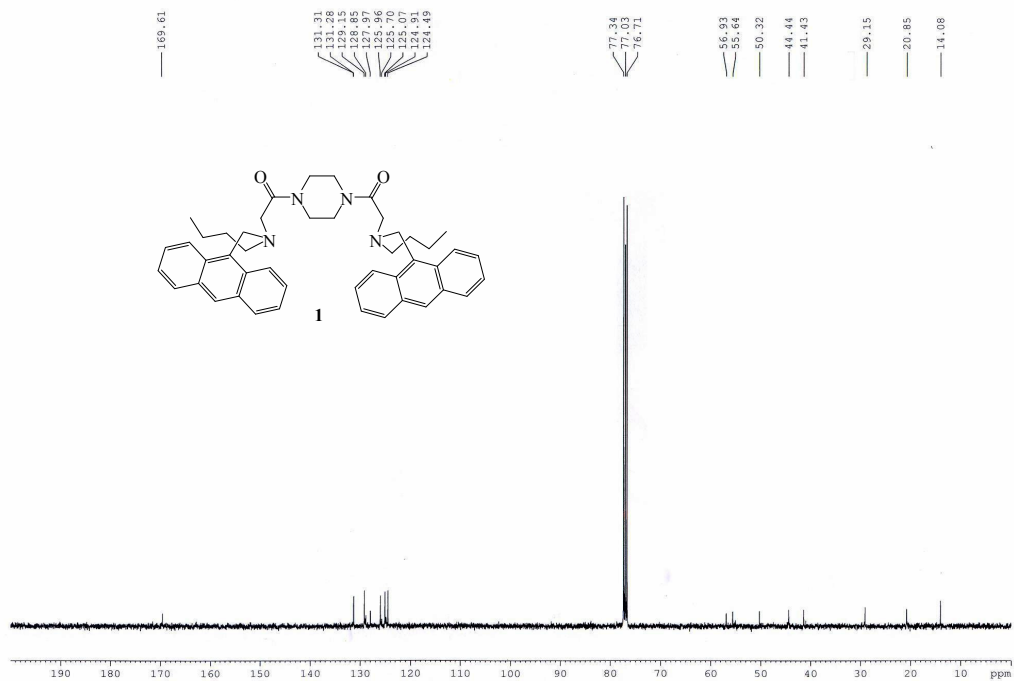

\*\*\*



**Mass of 1:**

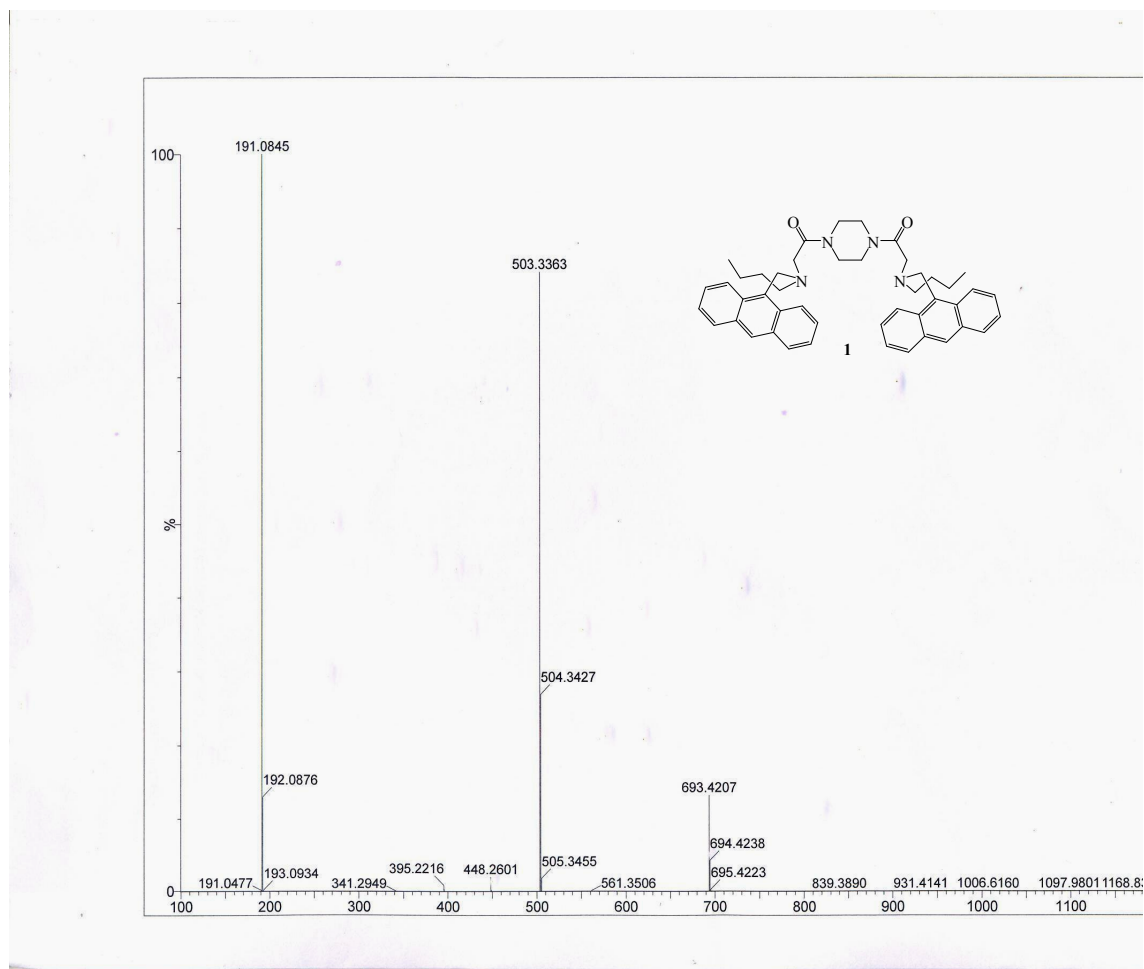

**$^1\text{H}$  NMR of 2 (400 MHz,  $\text{CDCl}_3$ ):**

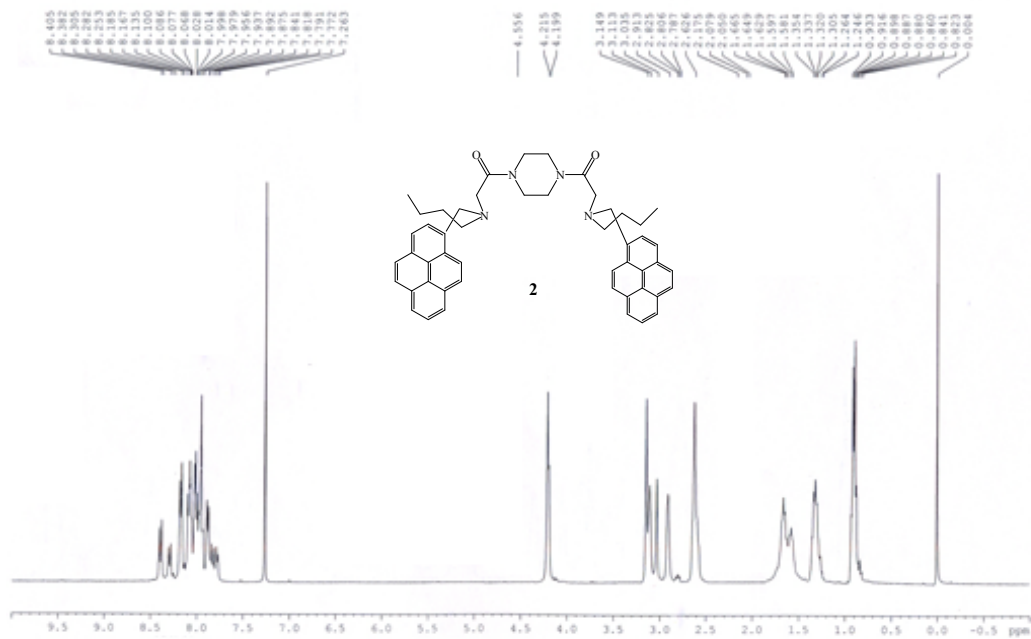

**$^{13}\text{C}$  NMR of 2 (CDCl<sub>3</sub>, 100 MHz):**

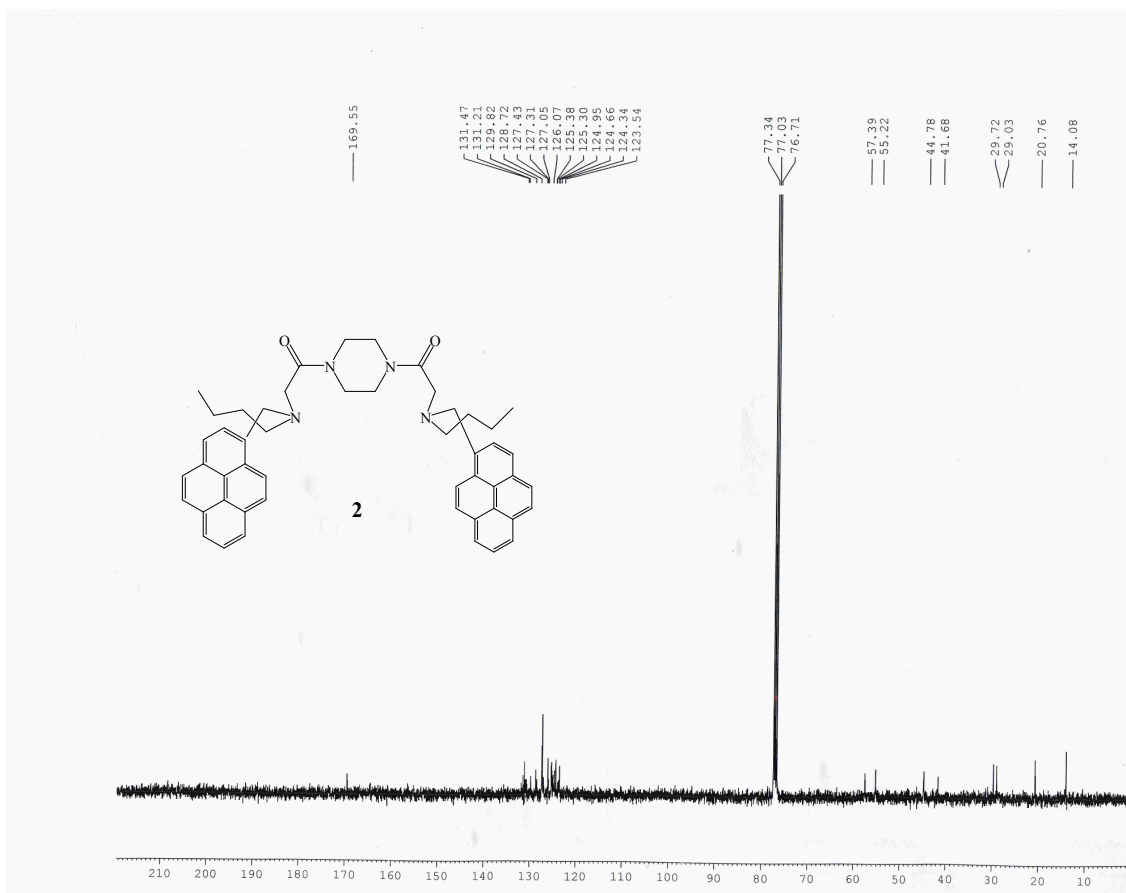

**Mass of 2:**

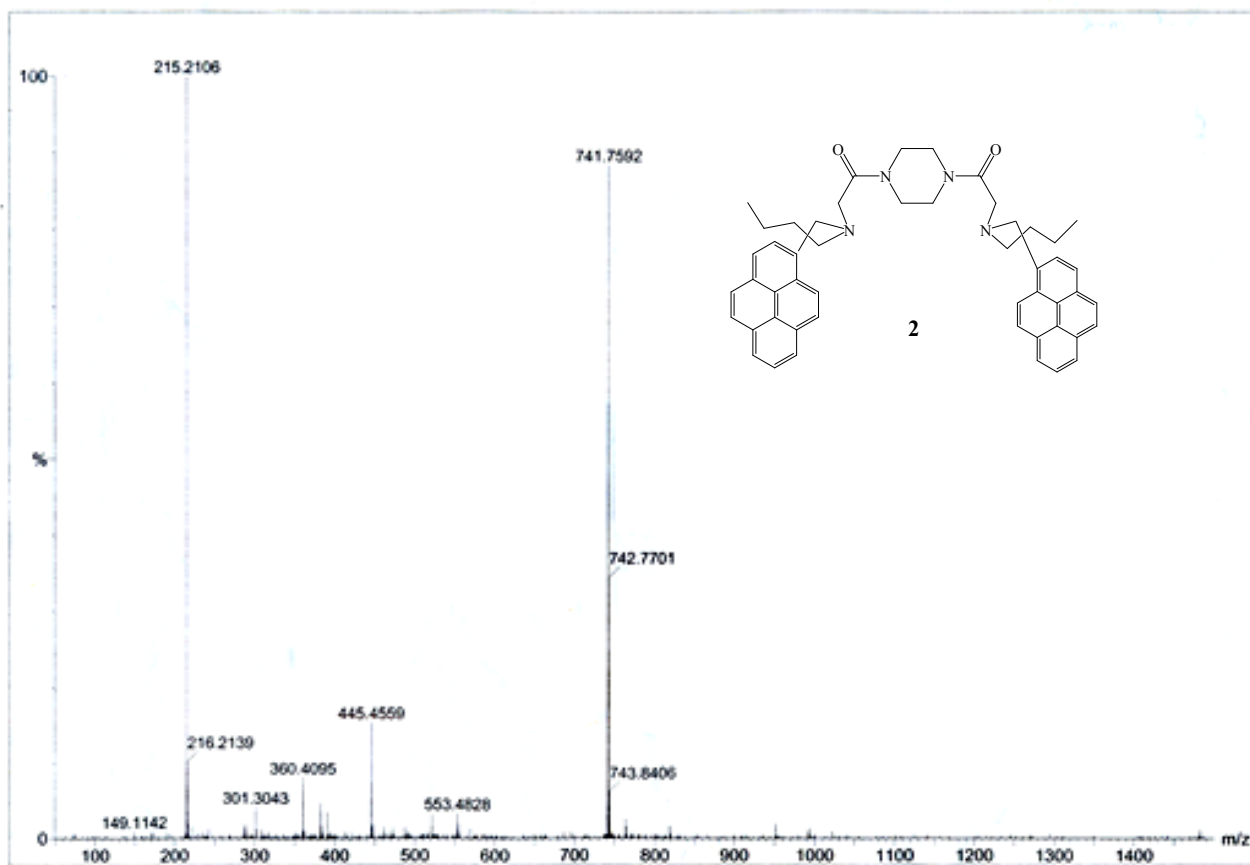

Supplement: c3nj00855j.pdf [file c3nj00855j.pdf]
